# Supplementary material for: Climate Change Impacts on Atlantic Oceanic Island Tuna Fisheries
Source: Frontiers journal article supplement (doi:10.3389/fmars.2021.634280), 2021-02-23
Supplement: Table_1.DOCX [file Table_1.DOCX]

Supplementary Table S.1 OBIS Citations

Dataset citations *Thunnus maccoyii*

| **Dataset name** | **Citation** |
| --- | --- |
| [IMOS - Animal Tracking Facility - Acoustic Tracking - Quality Controlled Detections (2007 -2017)](http://portal.obis.org/dataset/0820b10a-5710-4e90-b9ed-a2ad7c7ec742) | Any users of IMOS data are required to clearly acknowledge the source of the material derived from IMOS in the format: "Data was sourced from the Integrated Marine Observing System (IMOS) - IMOS is a national collaborative research infrastructure, supported by the Australian Government. The database is a centralised acoustic telemetry data repository maintained by the IMOS Animal Tracking Facility (IMOS ATF) and the Australian Ocean Data Network (AODN, https://portal.aodn.org.au/)." |
| [Bureau of Rural Sciences, Commercial Fisheries Presence, Australia, 2000-2002](http://portal.obis.org/dataset/d13ec1f1-d82a-4cdb-92e9-3f2144bf7a2e) | Bureau of Rural Sciences - National commercial fisheries half-degree data set 2000-2002 |
| [New Zealand research tagging database](http://portal.obis.org/dataset/95518627-a380-4691-86d8-3a3b5a11196c) | Ministry for Primary Industries (2014). New Zealand research tagging database. Southwestern Pacific OBIS, National Institute of Water and Atmospheric Research (NIWA), Wellington, New Zealand, 411926 records, Online http://nzobisipt.niwa.co.nz/resource.do?r=mpi_tag released on November 5, 2014. |
| [Western Australian Museum Fish Collection - Marine records](http://portal.obis.org/dataset/f8c046f0-e8ae-49f5-b94c-f78809a8b7dc) | null |
| [New Zealand fish and squid distributions from research bottom trawls 1964-2008](http://portal.obis.org/dataset/231dc661-d8d9-4d49-9ff0-45bd21a08541) | NIWA (2014). New Zealand fish and squid distributions from research bottom trawls. Southwestern Pacific OBIS, National Institute of Water and Atmospheric Research (NIWA), Wellington, New Zealand, 486781 records, Online http://nzobisipt.niwa.co.nz/resource.do?r=obisprovider released on May 8, 2014. |
| [Australian National Fish Collection](http://portal.obis.org/dataset/5db2ffe4-8764-4647-9271-467192832793) | null |
| [asean_fish_occurrences_literature](http://portal.obis.org/dataset/d6e71897-684a-49e4-9c22-19605d626c2a) | null |
| [iziko South African Museum - Fish Collection](http://portal.obis.org/dataset/8a1ae661-e911-4967-bc06-1168fc5f2d89) | iziko South African Museum - Fish Collection |
| [Museums Victoria Ichthyology Collection](http://portal.obis.org/dataset/58f229d6-8aad-4d85-b4b6-621d4f25d5ec) | Bray D (2017): Museums Victoria Ichthyology Collection. v1.1. CSIRO Oceans and Atmosphere. Dataset/Occurrence. http://ogc-act.csiro.au/ipt/resource?r=nmv_ichthyology&v=1.1 |
| [Ecoscope Observation Database](http://portal.obis.org/dataset/f62024d7-1126-41a8-8dde-ff257d232c4d) | Cauquil, P., Barde, J., Rodriguez, C., Chassot, E., Chavance, P. 2012. Ecoscope Observation Database. Institut de Recherche pour le Developpement (IRD). https://doi.org/10.15468/dz1kk0 |
| [BOLD Public Fish Data](http://portal.obis.org/dataset/292f775d-c300-4e21-8af2-b3b16a0a0ddc) | null |
| [South Australian Museum Ichthyology Collection - marine records](http://portal.obis.org/dataset/6e99cb6c-0efe-4087-b808-19c7cc17ae3d) | null |
| [BOLD - Australian records](http://portal.obis.org/dataset/937da8a1-06b0-40ad-8ea4-af9db9490081) | Page R D M (2016). International Barcode of Life project (iBOL). Institute of Biodiversity, Animal Health and Comparative Medicine, College of Medical, Veterinary and Life Sciences, University of Glasgow. Occurrence Dataset https://doi.org/10.15468/inygc6 accessed via GBIF.org on 2017-06-23. |
| [Victorian Biodiversity Atlas, Victoria, Australia (1900-2017) - marine records](http://portal.obis.org/dataset/0264be1a-9d3f-495d-afcb-ac22718a70ce) | In any reproduction, distribution or publication of the data, or in any use or adaptation of the data to create derivative works, the user must include a citation which attributes the source of the data and the date the data was published, as follows: Data Source: 'Victorian Biodiversity Atlas', Â© The State of Victoria, Department of Environment, Land, Water and Planning (published [month, year]). Additional details are at https://www.environment.vic.gov.au/biodiversity/victorian-biodiversity-atlas/terms-and-conditions |
| [South Australian Museum Australian Biological Tissue Collection - marine records](http://portal.obis.org/dataset/47d6cc38-cc22-438d-a1bd-c63202d85290) | null |
| [Australian Museum Ichthyology Collection](http://portal.obis.org/dataset/a0737a06-66ef-41e7-9458-9c05f53340b5) | McGrouther M (2017): Australian Museum Ichthyology Collection. v1.1. CSIRO Oceans and Atmosphere. Dataset/Occurrence. http://ogc-act.csiro.au/ipt/resource?r=am_ichthyology&v=1.1 |
| [Queen Victoria Museum and Art Gallery - Ichthyology](http://portal.obis.org/dataset/4a0703e0-0fde-49c4-916e-76f14afc4fe4) | null |
| [National Museum of Natural History Vertebrate Zoology Fishes Collections](http://portal.obis.org/dataset/d6d6fe4c-425f-4ce7-bf28-7a6befaeb413) | National Museum of Natural History, Smithsonian Institution NMNH Fishes Collection Database. National Museum of Natural History, Smithsonian Institution, 10th and Constitution Ave. N.W., Washington, DC 20560-0193, 2007. |
| [Queensland Museum Fishes - Marine records](http://portal.obis.org/dataset/e06daf5d-9e6b-44e1-a6a7-cc91a3ee1f3b) | null |
| [Occurrence and distribution of marine wildlife in the Bremer Bay region, Western Australia, Australia (2017)](http://portal.obis.org/dataset/379ebd9e-e257-43f9-b8cf-88e133eb57de) | null |
| [Soviet Trawl Fishery Data (New Zealand Waters) 1964-1987](http://portal.obis.org/dataset/685b3956-c37a-433a-b661-2bb7b11cf9f8) | Ministry for Primary Industries (2014). Soviet Fishery Data (New Zealand Waters) 1964-1987. Southwestern Pacific OBIS, National Institute of Water and Atmospheric Research (NIWA), Wellington, New Zealand, 111883 records, Online http://nzobisipt.niwa.co.nz/resource.do?r=mbis_soviettrawl released on November 5, 2014. |
| [Investigation of School and Gummy Shark Nursery Areas in South East Tasmania, Australia, 1991-1997](http://portal.obis.org/dataset/6d58ae08-4657-42bc-99fc-61e69278db13) | null |
| [Fishbase occurrences hosted by GBIF-Sweden](http://portal.obis.org/dataset/9b787218-7138-4ffa-8ba6-36d63d391f8c) | Froese, R. and D. Pauly. Editors. 200x. FishBase. World Wide Web electronic publication. www.fishbase.org, version (xx/200x). |

Dataset citations *Thunnus alalonga*

| **Dataset name** | **Citation** |
| --- | --- |
| [Marine and Coastal Management - Linefish Dataset (AfrOBIS)](http://portal.obis.org/dataset/9f1eb607-5c81-4bd3-a869-09a190c5aee3) | Marine and Coastal Management - Linefish Dataset |
| [NOAAs Southeast Fishery Science Center (SEFSC) Fisheries Log Book System (FLS) Commercial Pelagic Logbook Data](http://portal.obis.org/dataset/3d9cba1d-9b12-4ea6-9ab1-5fb12664c66f) | Southeast Fisheries Science Center, National Oceanic and Atmospheric Administration (year). NOAA Southeast Fishery Science Center (SEFSC) Fisheries Log Book System (FLS) Commercial Pelagic Logbook Data. Consulted on http://www.iobis.org on [date]. |
| [NOAA Southeast Fishery Science Center (SEFSC) Commercial Pelagic Observer Program (POP) Data](http://portal.obis.org/dataset/7aee17f1-d6e8-4204-a4b2-eafdf89563cf) | Southeast Fisheries Science Center, National Oceanic and Atmospheric Administration (year). NOAA Southeast Fishery Science Center (SEFSC) Commercial Pelagic Observer Program (POP) Data. Consulted on http://www.iobis.org on [date]. |
| [Ecoscope Observation Database](http://portal.obis.org/dataset/f62024d7-1126-41a8-8dde-ff257d232c4d) | Cauquil, P., Barde, J., Rodriguez, C., Chassot, E., Chavance, P. 2012. Ecoscope Observation Database. Institut de Recherche pour le Developpement (IRD). https://doi.org/10.15468/dz1kk0 |
| [New Zealand research tagging database](http://portal.obis.org/dataset/95518627-a380-4691-86d8-3a3b5a11196c) | Ministry for Primary Industries (2014). New Zealand research tagging database. Southwestern Pacific OBIS, National Institute of Water and Atmospheric Research (NIWA), Wellington, New Zealand, 411926 records, Online http://nzobisipt.niwa.co.nz/resource.do?r=mpi_tag released on November 5, 2014. |
| [Bureau of Rural Sciences, Commercial Fisheries Presence, Australia, 2000-2002](http://portal.obis.org/dataset/d13ec1f1-d82a-4cdb-92e9-3f2144bf7a2e) | Bureau of Rural Sciences - National commercial fisheries half-degree data set 2000-2002 |
| [POPA- Fisheries Observer Program of the Azores: Tuna species caught in the Azores tuna fishery from 1998 to 2013](http://portal.obis.org/dataset/a08db4f0-5df1-4ff3-a9c8-4af42a31cdba) | Machete, M.; Institute of Marine Research (IMAR), Portugal; Department of Oceanography and Fisheries, University of the Azores (DOP/UAC), Portugal; (2014): POPA- Fisheries Observer Program of the Azores: Tuna species caught in the Azores tuna fishery from 1998 to 2013. https://doi.org/10.14284/17 |
| [Ecoscope tuna observer data](http://portal.obis.org/dataset/5ad4244f-895a-4b9c-99be-1f88f5369023) | Cauquil, P., Barde, J., Rodriguez, C., Chassot, E., Chavance, P. 2012. Ecoscope tuna observer data. Institut de Recherche pour le Developpement (IRD). https://doi.org/10.15468/mkrtxh |
| [Marine biodiversity atlas of the Balearic Sea](http://portal.obis.org/dataset/e09c824c-cbd8-4529-b382-5306b2b3a875) | Deudero, Vallespir, Obrador 2011. Atlas de Biodiversidad Marina del Mar Balear. http://www.ba.ieo.es |
| [Australian Museum Ichthyology Collection](http://portal.obis.org/dataset/a0737a06-66ef-41e7-9458-9c05f53340b5) | McGrouther M (2017): Australian Museum Ichthyology Collection. v1.1. CSIRO Oceans and Atmosphere. Dataset/Occurrence. http://ogc-act.csiro.au/ipt/resource?r=am_ichthyology&v=1.1 |
| [Ecoscope Balbaya Database](http://portal.obis.org/dataset/cbe5c6ff-26f1-460d-8aee-557cb911a9bd) | Balbaya database, managed by IRD, funded by DCF / DG-MARE |
| [Fishbase occurrences hosted by GBIF-Sweden](http://portal.obis.org/dataset/9b787218-7138-4ffa-8ba6-36d63d391f8c) | Froese, R. and D. Pauly. Editors. 200x. FishBase. World Wide Web electronic publication. www.fishbase.org, version (xx/200x). |
| [Marine biological observation data from coastal and offshore surveys around New Zealand](http://portal.obis.org/dataset/b339f72f-eb69-40c5-b60c-1a37aaffdfb7) | SWPRON (2014). Marine biological observation data from coastal and offshore surveys around New Zealand. Southwestern Pacific OBIS, National Institute of Water and Atmospheric Research (NIWA), Wellington, New Zealand, 9092 records, Online http://nzobisipt.niwa.co.nz/resource.do?r=mbis_nz released on January 16, 2018. |
| [HMAP Dataset 10: Catalonian Coast](http://portal.obis.org/dataset/4f33dadf-6972-4f1d-9ea6-69a4b8d1a813) | Garrido, A. and Alegret, J.L., 'HMAP Dataset 10: Catalonian Coast', in M.G Barnard and J.H Nicholls (comp.) HMAP Data Pages (www.hull.ac.uk/hmap). |
| [Asia-Pacific Dataset](http://portal.obis.org/dataset/d5645e8d-11c1-454e-8a79-960cd2681d6a) | Jintsu-Uchifune, Y., Yamamoto, H. (2016) Marine organism occurrence data of the Asia-Pacific region extracted from literature. Available at http://www.godac.jamstec.go.jp/bismal/e/S9-5_Asia-Pacific. Accessed on yyyy-mm-dd. |
| [asean_fish_occurrences_literature](http://portal.obis.org/dataset/d6e71897-684a-49e4-9c22-19605d626c2a) | null |
| [POPA- Fisheries Observer Program of the Azores: Discards in the Azores tuna fishery from 1998 to 2013](http://portal.obis.org/dataset/647943b7-b951-4c5c-8280-fd917cc29bf1) | Machete, M.; Institute of Marine Research (IMAR), Portugal; Department of Oceanography and Fisheries, University of the Azores (DOP/UAC), Portugal; (2014): POPA- Fisheries Observer Program of the Azores: Discards in the Azores tuna fishery from 1998 to 2013. https://doi.org/10.14284/20 |
| [National Museum of Natural History Vertebrate Zoology Fishes Collections](http://portal.obis.org/dataset/d6d6fe4c-425f-4ce7-bf28-7a6befaeb413) | National Museum of Natural History, Smithsonian Institution NMNH Fishes Collection Database. National Museum of Natural History, Smithsonian Institution, 10th and Constitution Ave. N.W., Washington, DC 20560-0193, 2007. |
| [Shorefishes of the Tropical Eastern Pacific Online Information System (SFTEP)](http://portal.obis.org/dataset/0e1d55f3-c7dc-4355-a81f-e48a96795329) | null |
| [The fishes collection (IC) of the MusÃ©um national d'Histoire naturelle (MNHN - Paris)](http://portal.obis.org/dataset/705770e5-3474-4e69-be8b-3107a0c5610a) | Gicim data base, Pruvost P. Causse R., 2009 http://doi.org/10.15468/tm7whu |
| [iziko South African Museum - Fish Collection](http://portal.obis.org/dataset/8a1ae661-e911-4967-bc06-1168fc5f2d89) | iziko South African Museum - Fish Collection |
| [Marine fish volunteer ad-hoc recording scheme and historical records from around the United Kingdom between 1800 and 2010](http://portal.obis.org/dataset/9afeee64-62f3-44b9-a2fb-794b2afcf50a) | The National Marine Aquarium, United Kingdom (2017) Marine fish volunteer ad-hoc recording scheme and historical records from around the United Kingdom between 1800 and 2010 |
| [New Zealand fish and squid distributions from research bottom trawls 1964-2008](http://portal.obis.org/dataset/231dc661-d8d9-4d49-9ff0-45bd21a08541) | NIWA (2014). New Zealand fish and squid distributions from research bottom trawls. Southwestern Pacific OBIS, National Institute of Water and Atmospheric Research (NIWA), Wellington, New Zealand, 486781 records, Online http://nzobisipt.niwa.co.nz/resource.do?r=obisprovider released on May 8, 2014. |
| [Rare marine fishes taken in Irish waters from 1786 to 2008](http://portal.obis.org/dataset/46bffce3-4daf-47a2-868b-00a14765ea7a) | National Biodiversity Data Centre: Rare marine fishes taken in Irish waters from 1786 to 2008, 2013-06-18. Accessed via http://www.gbif.org/dataset/870afa50-180e-4153-b1b7-ec437ede20cb on yyyy-mm-dd https://doi.org/10.15468/yvsxdp |
| [Soviet Trawl Fishery Data (New Zealand Waters) 1964-1987](http://portal.obis.org/dataset/685b3956-c37a-433a-b661-2bb7b11cf9f8) | Ministry for Primary Industries (2014). Soviet Fishery Data (New Zealand Waters) 1964-1987. Southwestern Pacific OBIS, National Institute of Water and Atmospheric Research (NIWA), Wellington, New Zealand, 111883 records, Online http://nzobisipt.niwa.co.nz/resource.do?r=mbis_soviettrawl released on November 5, 2014. |
| [BOLD Public Fish Data](http://portal.obis.org/dataset/292f775d-c300-4e21-8af2-b3b16a0a0ddc) | null |
| [Australian National Fish Collection](http://portal.obis.org/dataset/5db2ffe4-8764-4647-9271-467192832793) | null |
| [IndOBIS, Indian Ocean Node of OBIS](http://portal.obis.org/dataset/63d77e40-618e-4e51-a49f-44e990afef85) | Chavan, VIshwas and C. T. Achuthankutty (editors), IndOBIS Catalogue of Life, Available at http://www.indobis.org/, Retrived day, date, year |
| [South Australian Museum Ichthyology Collection - marine records](http://portal.obis.org/dataset/6e99cb6c-0efe-4087-b808-19c7cc17ae3d) | null |
| [BOLD - Australian records](http://portal.obis.org/dataset/937da8a1-06b0-40ad-8ea4-af9db9490081) | Page R D M (2016). International Barcode of Life project (iBOL). Institute of Biodiversity, Animal Health and Comparative Medicine, College of Medical, Veterinary and Life Sciences, University of Glasgow. Occurrence Dataset https://doi.org/10.15468/inygc6 accessed via GBIF.org on 2017-06-23. |
| [IndOBIS Dataset (16001-18000)](http://portal.obis.org/dataset/bd1c7214-984e-4d39-b2d4-1a0ddd36d918) | Indian Ocean Biogeographic Information System (IndOBIS)- Distribution records of marine organisms from the Indian Ocean |
| [USGS Patuxent Wildlife Research Center Seabirds Compendium](http://portal.obis.org/dataset/2a8ddd06-2a18-4fae-81cc-5f5bfe0ef335) | null |
| [Diveboard - Scuba diving citizen science observations](http://portal.obis.org/dataset/4d2a31a3-bb76-4ffe-a2f9-817e975f6ba9) | Diveboard - Scuba diving citizen science observations. Online at http://www.diveboard.com and http://ipt.diveboard.com/resource.do?r=diveboard-occurrences. https://dx.doi.org/10.15468/tnjrgy |
| [Observatoire Pelagis boat surveys 2003-2018](http://portal.obis.org/dataset/924c4d25-6358-44a3-8f4d-24086256ad3e) | Doremus, G. 2019. Observatoire Pelagis boat surveys 2003-2018. Data downloaded from OBIS-SEAMAP (http://seamap.env.duke.edu/dataset/1403) on yyyy-mm-dd. |
| [Canadian Museum of Nature Fish Collection](http://portal.obis.org/dataset/9f1a9d1c-833e-4fbc-9ecf-1918c7a8b699) | Khidas K (2018): Canadian Museum of Nature Fish Collection. v1.30. Canadian Museum of Nature. Dataset/Occurrence. http://ipt.nature.ca/resource?r=cmn_fish&v=1.30 |
| [Western Australian Museum Fish Collection - Marine records](http://portal.obis.org/dataset/f8c046f0-e8ae-49f5-b94c-f78809a8b7dc) | null |
| [Fish collection of National Museum of Nature and Science](http://portal.obis.org/dataset/1cf3ed54-598a-4f16-a326-01960e4b79a0) | Nakae M, Shinohara G (2018). Fish collection of National Museum of Nature and Science. National Museum of Nature and Science, Japan. Occurrence dataset https://doi.org/10.15468/w3dzv1 accessed via GBIF.org on yyyy-mm-dd. |
| [Fish Species Observed in the Hawaii Exclusive Economic Zone from the 1750s through 2003](http://portal.obis.org/dataset/528c565f-fdad-4638-b1a1-3fb385d4ac1f) | Mundy, Bruce. 2004. Fish Species Observed in the Hawaiian Exclusive Economic Zone from the 1750s through 2003 (NODC Accession 0001486). NOAA/NMFS. http://www.nodc.noaa.gov. |
| [Otolith reference collection, Instituto de Ciencias del Mar-CSIC](http://portal.obis.org/dataset/5bf31864-f4f6-4986-a2c5-1a0e5e9d9e26) | Institute of Marine Sciences (ICM-CSIC): ColecciÃ³n de referencia de otolitos, Instituto de Ciencias del Mar-CSIC. Accessed via http://www.gbif.org/dataset/e95d0010-b3f1-11de-82f8-b8a03c50a862 on yyyy-mm-dd https://doi.org/10.15468/wdwxid |
| [MARMAP Bongo Nets 1990-2009](http://portal.obis.org/dataset/5f2da252-6d49-4c9f-b3b3-1db53d75b345) | Marcel Reichert, 2010, MARMAP Bongo Nets 1990-2009, SCDNR/NOAA MARMAP Program, SCDNR MARMAP Aggregate data surveys, The Marine Resources Monitoring, Assessment, and Prediction (MARMAP) Program, Marine Resources Research Institute, South Carolina Department of Natural Resources, P. O. Box 12559, Charleston SC 29422-2559, U.S.A.Retrieved from http://www.usgs.gov/obis-usa/ |
| [SPC NECTALIS Zooplankton/Micronekton specimens, New Caledonia 2014](http://portal.obis.org/dataset/6a5bc28f-4dfe-4cbf-8a55-7e3a843997ab) | Allain, V., Menkes, C., 2014. Nectalis 3 cruise, RV Alis. https://doi.org/10.17600/14004900 |
| [UWFC Ichthyology Collection](http://portal.obis.org/dataset/87a421bf-4646-49e3-89b7-409b93f2ac7c) | null |
| [CSIRO, Soviet Fishery Data, Australia, 1965-1978](http://portal.obis.org/dataset/97d434fe-2a1b-47ab-8b76-7789685bf116) | CSIRO - Soviet Fishery surveys in Australian waters 1965-78 |
| [Kenya Marine and Fisheries Research Institute - Marine Species](http://portal.obis.org/dataset/a4a3166a-c3bc-4203-bc19-b3d0cdebe20e) | Dataset Creator: Kenya Marine and Fisheries Research Institute (KMFRI), Kenya Dataset Title: KMFRI Marine Dataset Release Date: September 2010 Dataset Release Place: Mombasa, Kenya Dataset Publisher: AfrOBIS, South Africa Online Resource: http://www.iobis.org/ |
| [Biodiversity of the Gulf of Mexico Database (BioGoMx)](http://portal.obis.org/dataset/d1001fdc-d4a2-4d01-bcd2-2e122f2ca537) | null |
| [Assessment of marine living resources in Mauritius: Marine commercial fish](http://portal.obis.org/dataset/d2e894a3-b5df-4c2a-a845-dcfd57192593) | Mauritius Oceanography Institute (2013) Assessment of marine living resources â€“ marine commercial fish http://www.mdgdb.com |
| [Previous_fisheries_REVIZEE_Program](http://portal.obis.org/dataset/dc589375-8701-4f8f-808f-ded341d281d6) | null |
| [Museum and Art Gallery of the Northern Territory Ichthyology Collection - Marine records](http://portal.obis.org/dataset/f17d8dae-4125-4a45-a491-81f8d018e19c) | null |

Dataset citations *Thunnus obesus*

| **Dataset name** | **Citation** |
| --- | --- |
| [NOAAs Southeast Fishery Science Center (SEFSC) Fisheries Log Book System (FLS) Commercial Pelagic Logbook Data](http://portal.obis.org/dataset/3d9cba1d-9b12-4ea6-9ab1-5fb12664c66f) | Southeast Fisheries Science Center, National Oceanic and Atmospheric Administration (year). NOAA Southeast Fishery Science Center (SEFSC) Fisheries Log Book System (FLS) Commercial Pelagic Logbook Data. Consulted on http://www.iobis.org on [date]. |
| [Ecoscope tuna observer data](http://portal.obis.org/dataset/5ad4244f-895a-4b9c-99be-1f88f5369023) | Cauquil, P., Barde, J., Rodriguez, C., Chassot, E., Chavance, P. 2012. Ecoscope tuna observer data. Institut de Recherche pour le Developpement (IRD). https://doi.org/10.15468/mkrtxh |
| [NOAA Southeast Fishery Science Center (SEFSC) Commercial Pelagic Observer Program (POP) Data](http://portal.obis.org/dataset/7aee17f1-d6e8-4204-a4b2-eafdf89563cf) | Southeast Fisheries Science Center, National Oceanic and Atmospheric Administration (year). NOAA Southeast Fishery Science Center (SEFSC) Commercial Pelagic Observer Program (POP) Data. Consulted on http://www.iobis.org on [date]. |
| [POPA- Fisheries Observer Program of the Azores: Tuna species caught in the Azores tuna fishery from 1998 to 2013](http://portal.obis.org/dataset/a08db4f0-5df1-4ff3-a9c8-4af42a31cdba) | Machete, M.; Institute of Marine Research (IMAR), Portugal; Department of Oceanography and Fisheries, University of the Azores (DOP/UAC), Portugal; (2014): POPA- Fisheries Observer Program of the Azores: Tuna species caught in the Azores tuna fishery from 1998 to 2013. https://doi.org/10.14284/17 |
| [Ecoscope Observation Database](http://portal.obis.org/dataset/f62024d7-1126-41a8-8dde-ff257d232c4d) | Cauquil, P., Barde, J., Rodriguez, C., Chassot, E., Chavance, P. 2012. Ecoscope Observation Database. Institut de Recherche pour le Developpement (IRD). https://doi.org/10.15468/dz1kk0 |
| [Marine and Coastal Management - Linefish Dataset (AfrOBIS)](http://portal.obis.org/dataset/9f1eb607-5c81-4bd3-a869-09a190c5aee3) | Marine and Coastal Management - Linefish Dataset |
| [Ecoscope Balbaya Database](http://portal.obis.org/dataset/cbe5c6ff-26f1-460d-8aee-557cb911a9bd) | Balbaya database, managed by IRD, funded by DCF / DG-MARE |
| [Bureau of Rural Sciences, Commercial Fisheries Presence, Australia, 2000-2002](http://portal.obis.org/dataset/d13ec1f1-d82a-4cdb-92e9-3f2144bf7a2e) | Bureau of Rural Sciences - National commercial fisheries half-degree data set 2000-2002 |
| [POPA- Fisheries Observer Program of the Azores: Discards in the Azores tuna fishery from 1998 to 2013](http://portal.obis.org/dataset/647943b7-b951-4c5c-8280-fd917cc29bf1) | Machete, M.; Institute of Marine Research (IMAR), Portugal; Department of Oceanography and Fisheries, University of the Azores (DOP/UAC), Portugal; (2014): POPA- Fisheries Observer Program of the Azores: Discards in the Azores tuna fishery from 1998 to 2013. https://doi.org/10.14284/20 |
| [HMAP Dataset 15: Galapagos Marine Reserve, Ecuador III](http://portal.obis.org/dataset/7ca26f19-09ce-4bb4-8f92-405bdb835f25) | M. CastrejÃ³n and J. Moreno, 'HMAP Dataset 15: Galapagos Marine Reserve, Ecuador III', in D.J. Starkey and J.H. Nicholls (comp.) HMAP Data Pages (www.hull.ac.uk/hmap). |
| [Fishbase occurrences hosted by GBIF-Sweden](http://portal.obis.org/dataset/9b787218-7138-4ffa-8ba6-36d63d391f8c) | Froese, R. and D. Pauly. Editors. 200x. FishBase. World Wide Web electronic publication. www.fishbase.org, version (xx/200x). |
| [Biodiversity of the Gulf of Mexico Database (BioGoMx)](http://portal.obis.org/dataset/d1001fdc-d4a2-4d01-bcd2-2e122f2ca537) | null |
| [asean_fish_occurrences_literature](http://portal.obis.org/dataset/d6e71897-684a-49e4-9c22-19605d626c2a) | null |
| [National Museum of Natural History Vertebrate Zoology Fishes Collections](http://portal.obis.org/dataset/d6d6fe4c-425f-4ce7-bf28-7a6befaeb413) | National Museum of Natural History, Smithsonian Institution NMNH Fishes Collection Database. National Museum of Natural History, Smithsonian Institution, 10th and Constitution Ave. N.W., Washington, DC 20560-0193, 2007. |
| [Australian Museum Ichthyology Collection](http://portal.obis.org/dataset/a0737a06-66ef-41e7-9458-9c05f53340b5) | McGrouther M (2017): Australian Museum Ichthyology Collection. v1.1. CSIRO Oceans and Atmosphere. Dataset/Occurrence. http://ogc-act.csiro.au/ipt/resource?r=am_ichthyology&v=1.1 |
| [Shorefishes of the Tropical Eastern Pacific Online Information System (SFTEP)](http://portal.obis.org/dataset/0e1d55f3-c7dc-4355-a81f-e48a96795329) | null |
| [Australian National Fish Collection](http://portal.obis.org/dataset/5db2ffe4-8764-4647-9271-467192832793) | null |
| [Previous_fisheries_REVIZEE_Program](http://portal.obis.org/dataset/dc589375-8701-4f8f-808f-ded341d281d6) | null |
| [New Zealand research tagging database](http://portal.obis.org/dataset/95518627-a380-4691-86d8-3a3b5a11196c) | Ministry for Primary Industries (2014). New Zealand research tagging database. Southwestern Pacific OBIS, National Institute of Water and Atmospheric Research (NIWA), Wellington, New Zealand, 411926 records, Online http://nzobisipt.niwa.co.nz/resource.do?r=mpi_tag released on November 5, 2014. |
| [IndOBIS, Indian Ocean Node of OBIS](http://portal.obis.org/dataset/63d77e40-618e-4e51-a49f-44e990afef85) | Chavan, VIshwas and C. T. Achuthankutty (editors), IndOBIS Catalogue of Life, Available at http://www.indobis.org/, Retrived day, date, year |
| [IndOBIS Dataset (16001-18000)](http://portal.obis.org/dataset/bd1c7214-984e-4d39-b2d4-1a0ddd36d918) | Indian Ocean Biogeographic Information System (IndOBIS)- Distribution records of marine organisms from the Indian Ocean |
| [BOLD Public Fish Data](http://portal.obis.org/dataset/292f775d-c300-4e21-8af2-b3b16a0a0ddc) | null |
| [Diveboard - Scuba diving citizen science observations](http://portal.obis.org/dataset/4d2a31a3-bb76-4ffe-a2f9-817e975f6ba9) | Diveboard - Scuba diving citizen science observations. Online at http://www.diveboard.com and http://ipt.diveboard.com/resource.do?r=diveboard-occurrences. https://dx.doi.org/10.15468/tnjrgy |
| [iziko South African Museum - Fish Collection](http://portal.obis.org/dataset/8a1ae661-e911-4967-bc06-1168fc5f2d89) | iziko South African Museum - Fish Collection |
| [BOLD - Australian records](http://portal.obis.org/dataset/937da8a1-06b0-40ad-8ea4-af9db9490081) | Page R D M (2016). International Barcode of Life project (iBOL). Institute of Biodiversity, Animal Health and Comparative Medicine, College of Medical, Veterinary and Life Sciences, University of Glasgow. Occurrence Dataset https://doi.org/10.15468/inygc6 accessed via GBIF.org on 2017-06-23. |
| [The fishes collection (IC) of the MusÃ©um national d'Histoire naturelle (MNHN - Paris)](http://portal.obis.org/dataset/705770e5-3474-4e69-be8b-3107a0c5610a) | Gicim data base, Pruvost P. Causse R., 2009 http://doi.org/10.15468/tm7whu |
| [Marine fish volunteer ad-hoc recording scheme and historical records from around the United Kingdom between 1800 and 2010](http://portal.obis.org/dataset/9afeee64-62f3-44b9-a2fb-794b2afcf50a) | The National Marine Aquarium, United Kingdom (2017) Marine fish volunteer ad-hoc recording scheme and historical records from around the United Kingdom between 1800 and 2010 |
| [Seamounts Online version 2005-1 - European data](http://portal.obis.org/dataset/fa9bc19f-f98a-4278-ab99-c6d8ef4966c7) | Stocks, K., 2005. Seamounts Online: an online information system for seamount biology. San Diego Supercomputer Center, San Diego, California. World Wide Web electronic publication. http://seamounts.sdsc.edu. |
| [Fish collection of National Museum of Nature and Science](http://portal.obis.org/dataset/1cf3ed54-598a-4f16-a326-01960e4b79a0) | Nakae M, Shinohara G (2018). Fish collection of National Museum of Nature and Science. National Museum of Nature and Science, Japan. Occurrence dataset https://doi.org/10.15468/w3dzv1 accessed via GBIF.org on yyyy-mm-dd. |
| [Otolith reference collection, Instituto de Ciencias del Mar-CSIC](http://portal.obis.org/dataset/5bf31864-f4f6-4986-a2c5-1a0e5e9d9e26) | Institute of Marine Sciences (ICM-CSIC): ColecciÃ³n de referencia de otolitos, Instituto de Ciencias del Mar-CSIC. Accessed via http://www.gbif.org/dataset/e95d0010-b3f1-11de-82f8-b8a03c50a862 on yyyy-mm-dd https://doi.org/10.15468/wdwxid |
| [Ichthyology Collection - Royal Ontario Museum](http://portal.obis.org/dataset/b8617377-eb1c-4db2-baa6-8788a632e810) | null |
| [Asia-Pacific Dataset](http://portal.obis.org/dataset/d5645e8d-11c1-454e-8a79-960cd2681d6a) | Jintsu-Uchifune, Y., Yamamoto, H. (2016) Marine organism occurrence data of the Asia-Pacific region extracted from literature. Available at http://www.godac.jamstec.go.jp/bismal/e/S9-5_Asia-Pacific. Accessed on yyyy-mm-dd. |
| [Biodiversity Research Museum, Academia Sinica, Taiwan](http://portal.obis.org/dataset/ff8b7809-41bc-40ad-8160-0e33862817a0) | TELDAP, Biodiversity Research Museum, Academia Sinica, Taiwan (accessed through GBIF data portal, http://data.gbif.org/datasets/resource/9093, yyyy-mm-dd) |
| [New Zealand fish and squid distributions from research bottom trawls 1964-2008](http://portal.obis.org/dataset/231dc661-d8d9-4d49-9ff0-45bd21a08541) | NIWA (2014). New Zealand fish and squid distributions from research bottom trawls. Southwestern Pacific OBIS, National Institute of Water and Atmospheric Research (NIWA), Wellington, New Zealand, 486781 records, Online http://nzobisipt.niwa.co.nz/resource.do?r=obisprovider released on May 8, 2014. |
| [Fish Species Observed in the Hawaii Exclusive Economic Zone from the 1750s through 2003](http://portal.obis.org/dataset/528c565f-fdad-4638-b1a1-3fb385d4ac1f) | Mundy, Bruce. 2004. Fish Species Observed in the Hawaiian Exclusive Economic Zone from the 1750s through 2003 (NODC Accession 0001486). NOAA/NMFS. http://www.nodc.noaa.gov. |
| [Demersais survey in the Azores between 1996 and 2013](http://portal.obis.org/dataset/873ef09c-82b6-4d92-bc91-252c11f5e97d) | Menezes, G.; Institute of Marine Research (IMAR - Azores), Portugal; Department of Oceanography and Fisheries, University of the Azores (DOP/UAC), Portugal; (2014): Demersais survey in the Azores between 1996 and 2013. https://doi.org/10.14284/22 |
| [Kenya Marine and Fisheries Research Institute - Marine Species](http://portal.obis.org/dataset/a4a3166a-c3bc-4203-bc19-b3d0cdebe20e) | Dataset Creator: Kenya Marine and Fisheries Research Institute (KMFRI), Kenya Dataset Title: KMFRI Marine Dataset Release Date: September 2010 Dataset Release Place: Mombasa, Kenya Dataset Publisher: AfrOBIS, South Africa Online Resource: http://www.iobis.org/ |
| [Marine fish species in Benin EEZ](http://portal.obis.org/dataset/ac601ddd-503c-4062-9450-09e473f8d9d9) | C Adje (2014); Marine fish species in Benin EEZ; (Benin Oceanographic and Fisheries Research Centre (CRHOB); Dataset published by AfrOBIS; consulted via iOBIS |
| [Fish specimens](http://portal.obis.org/dataset/c24bf1c2-2c62-4056-a841-56d94e6e876a) | ROM Fish Collection (accessed through GBIF data portal, http://data.gbif.org/datasets/resource/660, 2012-01-20) http://doi.org/10.15468/syisbx |
| [CSIRO, fish surveys by the Courageous, 1978-1979](http://portal.obis.org/dataset/c53a1d63-0ca7-4481-8607-0b2d01f9f99a) | null |
| [Assessment of marine living resources in Mauritius: Marine commercial fish](http://portal.obis.org/dataset/d2e894a3-b5df-4c2a-a845-dcfd57192593) | Mauritius Oceanography Institute (2013) Assessment of marine living resources â€“ marine commercial fish http://www.mdgdb.com |
| [Queensland Museum Fishes - Marine records](http://portal.obis.org/dataset/e06daf5d-9e6b-44e1-a6a7-cc91a3ee1f3b) | null |
| [Ocean Genome Resource](http://portal.obis.org/dataset/f1da0955-5ece-4f98-ab77-f10c20bdd3ca) | Ocean Genome Legacy, Ocean Genome Resource database, published on the Web at www.oglf.org/Catalog.htm, accessed [date]. Deposited at OGL by Sterrer, Wolfgang |
| [Australian Institute of Marine Science (AIMS) - CReefs Ningaloo Reef Biodiversity Expedition, Australia (2008 - 2010)](http://portal.obis.org/dataset/f378dbb6-0513-4a1b-81fb-075a985fef97) | Australian Institute of Marine Science (AIMS). 2009, CReefs Australia - Ningaloo, Western Australia, https://apps.aims.gov.au/metadata/view/7f82b6ac-427c-4b9b-a36c-12799cab6ae6, accessed 16-Jul-2018 |

Dataset citations *Thunnus albacares*

| **Dataset name** | **Citation** |
| --- | --- |
| [NOAAs Southeast Fishery Science Center (SEFSC) Fisheries Log Book System (FLS) Commercial Pelagic Logbook Data](http://portal.obis.org/dataset/3d9cba1d-9b12-4ea6-9ab1-5fb12664c66f) | Southeast Fisheries Science Center, National Oceanic and Atmospheric Administration (year). NOAA Southeast Fishery Science Center (SEFSC) Fisheries Log Book System (FLS) Commercial Pelagic Logbook Data. Consulted on http://www.iobis.org on [date]. |
| [Ecoscope tuna observer data](http://portal.obis.org/dataset/5ad4244f-895a-4b9c-99be-1f88f5369023) | Cauquil, P., Barde, J., Rodriguez, C., Chassot, E., Chavance, P. 2012. Ecoscope tuna observer data. Institut de Recherche pour le Developpement (IRD). https://doi.org/10.15468/mkrtxh |
| [NOAA Southeast Fishery Science Center (SEFSC) Commercial Pelagic Observer Program (POP) Data](http://portal.obis.org/dataset/7aee17f1-d6e8-4204-a4b2-eafdf89563cf) | Southeast Fisheries Science Center, National Oceanic and Atmospheric Administration (year). NOAA Southeast Fishery Science Center (SEFSC) Commercial Pelagic Observer Program (POP) Data. Consulted on http://www.iobis.org on [date]. |
| [Ecoscope Observation Database](http://portal.obis.org/dataset/f62024d7-1126-41a8-8dde-ff257d232c4d) | Cauquil, P., Barde, J., Rodriguez, C., Chassot, E., Chavance, P. 2012. Ecoscope Observation Database. Institut de Recherche pour le Developpement (IRD). https://doi.org/10.15468/dz1kk0 |
| [Marine and Coastal Management - Linefish Dataset (AfrOBIS)](http://portal.obis.org/dataset/9f1eb607-5c81-4bd3-a869-09a190c5aee3) | Marine and Coastal Management - Linefish Dataset |
| [Ecoscope Balbaya Database](http://portal.obis.org/dataset/cbe5c6ff-26f1-460d-8aee-557cb911a9bd) | Balbaya database, managed by IRD, funded by DCF / DG-MARE |
| [Bureau of Rural Sciences, Commercial Fisheries Presence, Australia, 2000-2002](http://portal.obis.org/dataset/d13ec1f1-d82a-4cdb-92e9-3f2144bf7a2e) | Bureau of Rural Sciences - National commercial fisheries half-degree data set 2000-2002 |
| [POPA- Fisheries Observer Program of the Azores: Tuna species caught in the Azores tuna fishery from 1998 to 2013](http://portal.obis.org/dataset/a08db4f0-5df1-4ff3-a9c8-4af42a31cdba) | Machete, M.; Institute of Marine Research (IMAR), Portugal; Department of Oceanography and Fisheries, University of the Azores (DOP/UAC), Portugal; (2014): POPA- Fisheries Observer Program of the Azores: Tuna species caught in the Azores tuna fishery from 1998 to 2013. https://doi.org/10.14284/17 |
| [New Zealand research tagging database](http://portal.obis.org/dataset/95518627-a380-4691-86d8-3a3b5a11196c) | Ministry for Primary Industries (2014). New Zealand research tagging database. Southwestern Pacific OBIS, National Institute of Water and Atmospheric Research (NIWA), Wellington, New Zealand, 411926 records, Online http://nzobisipt.niwa.co.nz/resource.do?r=mpi_tag released on November 5, 2014. |
| [Previous_fisheries_REVIZEE_Program](http://portal.obis.org/dataset/dc589375-8701-4f8f-808f-ded341d281d6) | null |
| [Fishbase occurrences hosted by GBIF-Sweden](http://portal.obis.org/dataset/9b787218-7138-4ffa-8ba6-36d63d391f8c) | Froese, R. and D. Pauly. Editors. 200x. FishBase. World Wide Web electronic publication. www.fishbase.org, version (xx/200x). |
| [National Museum of Natural History Vertebrate Zoology Fishes Collections](http://portal.obis.org/dataset/d6d6fe4c-425f-4ce7-bf28-7a6befaeb413) | National Museum of Natural History, Smithsonian Institution NMNH Fishes Collection Database. National Museum of Natural History, Smithsonian Institution, 10th and Constitution Ave. N.W., Washington, DC 20560-0193, 2007. |
| [Shorefishes of the Tropical Eastern Pacific Online Information System (SFTEP)](http://portal.obis.org/dataset/0e1d55f3-c7dc-4355-a81f-e48a96795329) | null |
| [Australian Museum Ichthyology Collection](http://portal.obis.org/dataset/a0737a06-66ef-41e7-9458-9c05f53340b5) | McGrouther M (2017): Australian Museum Ichthyology Collection. v1.1. CSIRO Oceans and Atmosphere. Dataset/Occurrence. http://ogc-act.csiro.au/ipt/resource?r=am_ichthyology&v=1.1 |
| [Diversity of the Indo-Pacific (DIPnet)](http://portal.obis.org/dataset/c04414fb-9ac0-42d2-be21-f0754f416e04) | Deck J, Gaither MR, Ewing R, Davies N, Meyer C, Riginos C, Toonen R, Crandall E. The Genomic Observatories Metadatabase (GeOMe): A new repository for field and sampling event metadata associated with genetic samples. Plos Biology In review. |
| [asean_fish_occurrences_literature](http://portal.obis.org/dataset/d6e71897-684a-49e4-9c22-19605d626c2a) | null |
| [Asia-Pacific Dataset](http://portal.obis.org/dataset/d5645e8d-11c1-454e-8a79-960cd2681d6a) | Jintsu-Uchifune, Y., Yamamoto, H. (2016) Marine organism occurrence data of the Asia-Pacific region extracted from literature. Available at http://www.godac.jamstec.go.jp/bismal/e/S9-5_Asia-Pacific. Accessed on yyyy-mm-dd. |
| [IndOBIS, Indian Ocean Node of OBIS](http://portal.obis.org/dataset/63d77e40-618e-4e51-a49f-44e990afef85) | Chavan, VIshwas and C. T. Achuthankutty (editors), IndOBIS Catalogue of Life, Available at http://www.indobis.org/, Retrived day, date, year |
| [IndOBIS Dataset (16001-18000)](http://portal.obis.org/dataset/bd1c7214-984e-4d39-b2d4-1a0ddd36d918) | Indian Ocean Biogeographic Information System (IndOBIS)- Distribution records of marine organisms from the Indian Ocean |
| [BOLD Public Fish Data](http://portal.obis.org/dataset/292f775d-c300-4e21-8af2-b3b16a0a0ddc) | null |
| [iziko South African Museum - Fish Collection](http://portal.obis.org/dataset/8a1ae661-e911-4967-bc06-1168fc5f2d89) | iziko South African Museum - Fish Collection |
| [Diveboard - Scuba diving citizen science observations](http://portal.obis.org/dataset/4d2a31a3-bb76-4ffe-a2f9-817e975f6ba9) | Diveboard - Scuba diving citizen science observations. Online at http://www.diveboard.com and http://ipt.diveboard.com/resource.do?r=diveboard-occurrences. https://dx.doi.org/10.15468/tnjrgy |
| [Seamounts Online version 2005-1 - European data](http://portal.obis.org/dataset/fa9bc19f-f98a-4278-ab99-c6d8ef4966c7) | Stocks, K., 2005. Seamounts Online: an online information system for seamount biology. San Diego Supercomputer Center, San Diego, California. World Wide Web electronic publication. http://seamounts.sdsc.edu. |
| [Biodiversity of the Gulf of Mexico Database (BioGoMx)](http://portal.obis.org/dataset/d1001fdc-d4a2-4d01-bcd2-2e122f2ca537) | null |
| [South African Institute for Aquatic Biodiversity - Fish Collection](http://portal.obis.org/dataset/9ff216fc-777e-4f9b-9860-95ed7366870d) | South African Institute for Aquatic Biodiversity - Fish Collection |
| [Australian National Fish Collection](http://portal.obis.org/dataset/5db2ffe4-8764-4647-9271-467192832793) | null |
| [CRED Rapid Ecological Assessments of Fish Belt Transect Surveys and Fish Stationary Point Count Surveys in the Pacific Ocean 2000-2010](http://portal.obis.org/dataset/c96e22c5-7f34-402b-a83d-17a4c7b93f56) | Coral Reef Ecosystem Division (CRED), Pacific Island Fisheries Sciences Center, NOAA National Marine Fisheries Service. 2011. CRED Rapid Ecological Assessments of Fish Belt Transect Surveys and Fish Stationary Point Count Surveys in the Pacific Ocean 2000-2010. Coral Reef Ecosystem Division, Honolulu, HI.Retrieved from http://www.usgs.gov/obis-usa/. |
| [New Zealand fish and squid distributions from research bottom trawls 1964-2008](http://portal.obis.org/dataset/231dc661-d8d9-4d49-9ff0-45bd21a08541) | NIWA (2014). New Zealand fish and squid distributions from research bottom trawls. Southwestern Pacific OBIS, National Institute of Water and Atmospheric Research (NIWA), Wellington, New Zealand, 486781 records, Online http://nzobisipt.niwa.co.nz/resource.do?r=obisprovider released on May 8, 2014. |
| [BOLD - Australian records](http://portal.obis.org/dataset/937da8a1-06b0-40ad-8ea4-af9db9490081) | Page R D M (2016). International Barcode of Life project (iBOL). Institute of Biodiversity, Animal Health and Comparative Medicine, College of Medical, Veterinary and Life Sciences, University of Glasgow. Occurrence Dataset https://doi.org/10.15468/inygc6 accessed via GBIF.org on 2017-06-23. |
| [UFPE Oceanography Zooplankton Research](http://portal.obis.org/dataset/20bc33c9-c597-4a08-828a-62e82e8fa653) | null |
| [The fishes collection (IC) of the MusÃ©um national d'Histoire naturelle (MNHN - Paris)](http://portal.obis.org/dataset/705770e5-3474-4e69-be8b-3107a0c5610a) | Gicim data base, Pruvost P. Causse R., 2009 http://doi.org/10.15468/tm7whu |
| [Biodiversity Research Museum, Academia Sinica, Taiwan](http://portal.obis.org/dataset/ff8b7809-41bc-40ad-8160-0e33862817a0) | TELDAP, Biodiversity Research Museum, Academia Sinica, Taiwan (accessed through GBIF data portal, http://data.gbif.org/datasets/resource/9093, yyyy-mm-dd) |
| [USGS Patuxent Wildlife Research Center Seabirds Compendium](http://portal.obis.org/dataset/2a8ddd06-2a18-4fae-81cc-5f5bfe0ef335) | null |
| [Pelagic and Demersal Fish Database I, REVIZEE South Area (WSAOBIS)](http://portal.obis.org/dataset/6c19184e-c305-4273-8890-6d342d86f865) | null |
| [IndOBIS Dataset (82001-84000)](http://portal.obis.org/dataset/8e230527-988f-4984-8c30-ecc64771b06c) | Indian Ocean Biogeographic Information System (IndOBIS)- Distribution records of marine organisms from the Indian Ocean |
| [Canadian Museum of Nature Fish Collection](http://portal.obis.org/dataset/9f1a9d1c-833e-4fbc-9ecf-1918c7a8b699) | Khidas K (2018): Canadian Museum of Nature Fish Collection. v1.30. Canadian Museum of Nature. Dataset/Occurrence. http://ipt.nature.ca/resource?r=cmn_fish&v=1.30 |
| [SEFSC GoMex Oceanic 1996](http://portal.obis.org/dataset/b6e5892e-cebe-4a0a-9487-0aef1d4aa3eb) | Garrison, L. 2013. SEFSC GoMex Oceanic 1996. Data downloaded from OBIS-SEAMAP (http://seamap.env.duke.edu/dataset/25) on yyyy-mm-dd. |
| [Queensland Museum Fishes - Marine records](http://portal.obis.org/dataset/e06daf5d-9e6b-44e1-a6a7-cc91a3ee1f3b) | null |
| [SEFSC GoMex Oceanic 1993 (S)](http://portal.obis.org/dataset/003063a2-57ad-4c7b-a58b-df6f40fbf4ba) | Garrison, L. 2013. SEFSC GoMex Oceanic 1993 (S). Data downloaded from OBIS-SEAMAP (http://seamap.env.duke.edu/dataset/17) on yyyy-mm-dd. |
| [World Ocean Database 2009](http://portal.obis.org/dataset/4354345d-7faf-4376-b326-ffbc04b6b0cd) | Baranova, O.K, T.D. O'Brien, T.P. Boyer and I.V. Smolyar (2009). Plankton data. Chapter 16 in Boyer, T. P., J. I. Antonov , O. K. Baranova, H. E. Garcia, D. R. Johnson, R. A. Locarnini, A. V. Mishonov, T. D. O'Brien, D. Seidov, I. V. Smolyar, M. M. Zweng, 2009. World Ocean Database 2009. S. Levitus, Ed., NOAA Atlas NESDIS 66, U.S. Gov. Printing Office, Wash., D.C., 216 pp., DVDs |
| [MARMAP Neuston Nets 1990-2009](http://portal.obis.org/dataset/513e4437-9cc7-4383-9a69-1bd18ec2046a) | Marcel Reichert, 2010, MARMAP Neuston Nets 1990-2009, SCDNR/NOAA MARMAP Program, SCDNR MARMAP Aggregate data surveys, The Marine Resources Monitoring, Assessment, and Prediction (MARMAP) Program, Marine Resources Research Institute, South Carolina Department of Natural Resources, P. O. Box 12559, Charleston SC 29422-2559, U.S.A.Retrieved from http://www.usgs.gov/obis-usa/ |
| [Marine fish volunteer ad-hoc recording scheme and historical records from around the United Kingdom between 1800 and 2010](http://portal.obis.org/dataset/9afeee64-62f3-44b9-a2fb-794b2afcf50a) | The National Marine Aquarium, United Kingdom (2017) Marine fish volunteer ad-hoc recording scheme and historical records from around the United Kingdom between 1800 and 2010 |
| [Marine and Coastal Research Institute - INVEMAR, Colombia,IABIN](http://portal.obis.org/dataset/f7777a70-e23c-436a-a0cb-9200bf87e194) | INVEMAR. SIBM en lÃ­nea: Sistema de InformaciÃ³n sobre Biodiversidad Marina. Santa Marta: Instituto de investigaciones Marinas y Costeras JosÃ© Benito Vives de AndrÃ©is,. http://www.invemar.org.co/siam/sibm/index.htm |
| [Western Australian Museum Fish Collection - Marine records](http://portal.obis.org/dataset/f8c046f0-e8ae-49f5-b94c-f78809a8b7dc) | null |
| [SEFSC Gomex Shelf 1994](http://portal.obis.org/dataset/f92ccbf5-6460-4319-8ee3-c672df824e45) | Garrison, L. 2013. SEFSC Gomex Shelf 1994. Data downloaded from OBIS-SEAMAP (http://seamap.env.duke.edu/dataset/35) on yyyy-mm-dd. |
| [SEFSC Gomex Shelf 2001](http://portal.obis.org/dataset/022b265a-9af7-42d2-97a3-23747a6e51c6) | Garrison, L. 2013. SEFSC Gomex Shelf 2001. Data downloaded from OBIS-SEAMAP (http://seamap.env.duke.edu/dataset/33) on yyyy-mm-dd. |
| [University of Costa Rica (UCR) Fish Database](http://portal.obis.org/dataset/1418786c-0a73-464b-be4b-743a021078bc) | Myrna LÃ³pez and William Bussing (1964): Museum of Zoology, Biology Department, University of Costa Rica |
| [Fish collection of National Museum of Nature and Science](http://portal.obis.org/dataset/1cf3ed54-598a-4f16-a326-01960e4b79a0) | Nakae M, Shinohara G (2018). Fish collection of National Museum of Nature and Science. National Museum of Nature and Science, Japan. Occurrence dataset https://doi.org/10.15468/w3dzv1 accessed via GBIF.org on yyyy-mm-dd. |
| [Marine species citizen-science observations from NatureWatch NZ](http://portal.obis.org/dataset/23c15f33-94a8-4e3e-bb76-5d5b0bf203f8) | NatureWatch NZ (2016). Marine species citizen-science observations from NatureWatch NZ. Southwestern Pacific OBIS, National Institute of Water and Atmospheric Research (NIWA), Wellington, New Zealand, 13030 records, Online http://nzobisipt.niwa.co.nz/resource.do?r=naturewatchnz released on March 26, 2017. |
| [SPC PROCFish/C Fish Observations Kiribati 2004](http://portal.obis.org/dataset/2d9b870a-e46a-43c8-872e-c77ca1c1c8a3) | Sauni S, Awira R, Vigliola L, Pinca S, Boblin P (2018): SPC PROCFish/C Fish Observations Kiribati 2004. v1.1. The Pacific Community (SPC). Dataset/Occurrence. https://ipt.sprep.org/resource?r=spc_procfish_finfish_kiribati_2004&v=1.1 |
| [SEFSC GoMex Oceanic 1992 (199)](http://portal.obis.org/dataset/3b4e38be-12a5-4201-be05-589dab5168b4) | Garrison, L. 2013. SEFSC GoMex Oceanic 1992 (199). Data downloaded from OBIS-SEAMAP (http://seamap.env.duke.edu/dataset/13) on yyyy-mm-dd. |
| [Fish Species Observed in the Hawaii Exclusive Economic Zone from the 1750s through 2003](http://portal.obis.org/dataset/528c565f-fdad-4638-b1a1-3fb385d4ac1f) | Mundy, Bruce. 2004. Fish Species Observed in the Hawaiian Exclusive Economic Zone from the 1750s through 2003 (NODC Accession 0001486). NOAA/NMFS. http://www.nodc.noaa.gov. |
| [Otolith reference collection, Instituto de Ciencias del Mar-CSIC](http://portal.obis.org/dataset/5bf31864-f4f6-4986-a2c5-1a0e5e9d9e26) | Institute of Marine Sciences (ICM-CSIC): ColecciÃ³n de referencia de otolitos, Instituto de Ciencias del Mar-CSIC. Accessed via http://www.gbif.org/dataset/e95d0010-b3f1-11de-82f8-b8a03c50a862 on yyyy-mm-dd https://doi.org/10.15468/wdwxid |
| [MARMAP Bongo Nets 1990-2009](http://portal.obis.org/dataset/5f2da252-6d49-4c9f-b3b3-1db53d75b345) | Marcel Reichert, 2010, MARMAP Bongo Nets 1990-2009, SCDNR/NOAA MARMAP Program, SCDNR MARMAP Aggregate data surveys, The Marine Resources Monitoring, Assessment, and Prediction (MARMAP) Program, Marine Resources Research Institute, South Carolina Department of Natural Resources, P. O. Box 12559, Charleston SC 29422-2559, U.S.A.Retrieved from http://www.usgs.gov/obis-usa/ |
| [SEFSC GoMex Oceanic 1994](http://portal.obis.org/dataset/6acd049e-2384-4986-b1f9-0c0c7c527d32) | Garrison, L. 2013. SEFSC GoMex Oceanic 1994. Data downloaded from OBIS-SEAMAP (http://seamap.env.duke.edu/dataset/19) on yyyy-mm-dd. |
| [SEFSC GoMex Oceanic 2000](http://portal.obis.org/dataset/77b84a54-cc6c-4bbf-b95e-35f495a7cbd8) | Garrison, L. 2013. SEFSC GoMex Oceanic 2000. Data downloaded from OBIS-SEAMAP (http://seamap.env.duke.edu/dataset/21) on yyyy-mm-dd. |
| [UWFC Ichthyology Collection](http://portal.obis.org/dataset/87a421bf-4646-49e3-89b7-409b93f2ac7c) | null |
| [Angolan Trawl Survey Data](http://portal.obis.org/dataset/88ec999b-056b-4b6c-a9d0-ae243e70349d) | Angolan Survey Data, Instituto Nacional de InvestigaÃ§Ã£o Pesqueira (INIP)(National Fishing Research Institute) (2014). Published by AfrOBIS; consulted via iOBIS. |
| [Marine species list for iSimangaliso Wetland Park 2009](http://portal.obis.org/dataset/8f843938-1617-4c9e-be03-d1a2af8ebd89) | Olbers, J. (2014). Marine species list for iSimangaliso Wetland Park. Ezemvelo KZN Wildlife |
| [Kenya Marine and Fisheries Research Institute - Marine Species](http://portal.obis.org/dataset/a4a3166a-c3bc-4203-bc19-b3d0cdebe20e) | Dataset Creator: Kenya Marine and Fisheries Research Institute (KMFRI), Kenya Dataset Title: KMFRI Marine Dataset Release Date: September 2010 Dataset Release Place: Mombasa, Kenya Dataset Publisher: AfrOBIS, South Africa Online Resource: http://www.iobis.org/ |
| [Marine observation data from surveys around Fiji](http://portal.obis.org/dataset/b0ae29fa-8e83-4218-ba06-80efa0cf82e5) | SWPRON (2018). Marine observation data from surveys around Fiji. Southwestern Pacific OBIS, National Institute of Water and Atmospheric Research (NIWA), Wellington, New Zealand, 1143 records, Online http://nzobisipt.niwa.co.nz/resource.do?r=fiji_marine_data released on January 16, 2018. |
| [Ocean Genome Resource](http://portal.obis.org/dataset/f1da0955-5ece-4f98-ab77-f10c20bdd3ca) | Ocean Genome Legacy, Ocean Genome Resource database, published on the Web at www.oglf.org/Catalog.htm, accessed [date]. Deposited at OGL by Sterrer, Wolfgang |
